# Supplementary material for: Reprogramming bone progenitor identity and potency through control of collagen density and oxygen tension
Source: PubMed Central journal article supplement (PMC8957015; doi:10.1016/j.isci.2022.104059), 2022-03-11
Supplement: mmc1.pdf [file mmc1.pdf]

**iScience, Volume 25**

**Supplemental information**

**Reprogramming bone progenitor identity  
and potency through control of collagen  
density and oxygen tension**

**Rawiya Al Hosni, Laurent Bozec, Scott J. Roberts, and Umber Cheema**

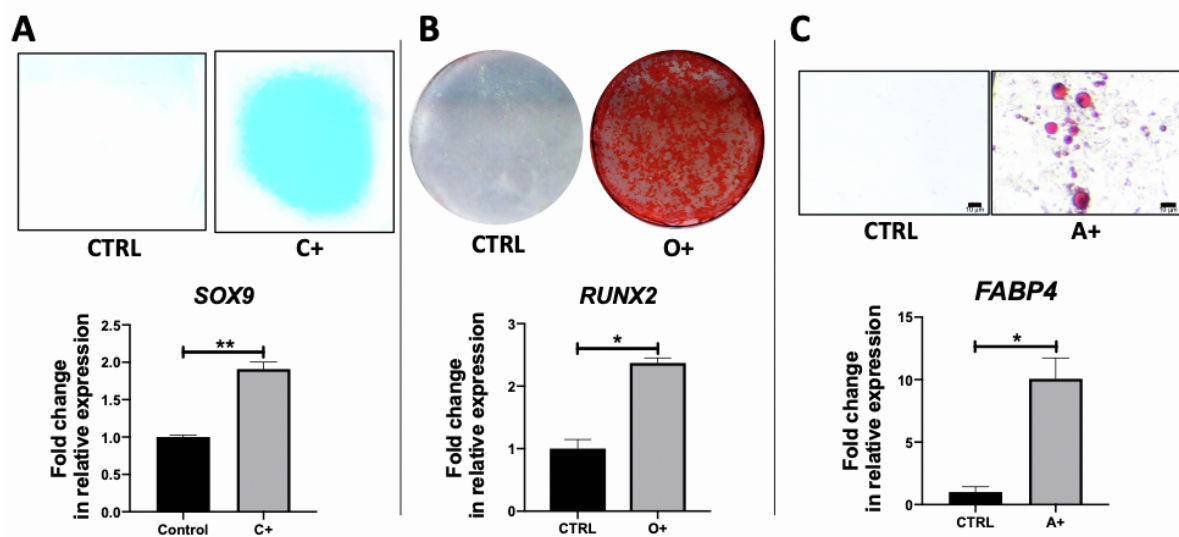

**Figure S1 Characterisation of AMSC potency, Related to Figure 1.** AMSCs were assessed for their ability to differentiate down the chondrogenic, osteogenic and adipogenic lineages. **A)** Chondrogenic differentiation assessed for GAGs detected using Alcian Blue after 7 days and *SOX9* gene expression analysed by qPCR. **B)** An osteogenic differentiation assay was conducted for 21 days, illustrating positive calcium phosphate staining using Alizarin Red with *RUNX2* expression analysed by qPCR. **C)** An adipogenic differentiation assay was conducted over 21 days, with the presence of fat droplets analysed using Oil Red O stain and *FABP4* expression relative to control analysed using qPCR (scale bar: 10  $\mu$ m). (Data are presented as the mean  $\pm$ S.E.M, Statistical analysis performed using Mann-Whitney test; \*\* $P$ <0.01; \* $P$ <0.05; n=3).

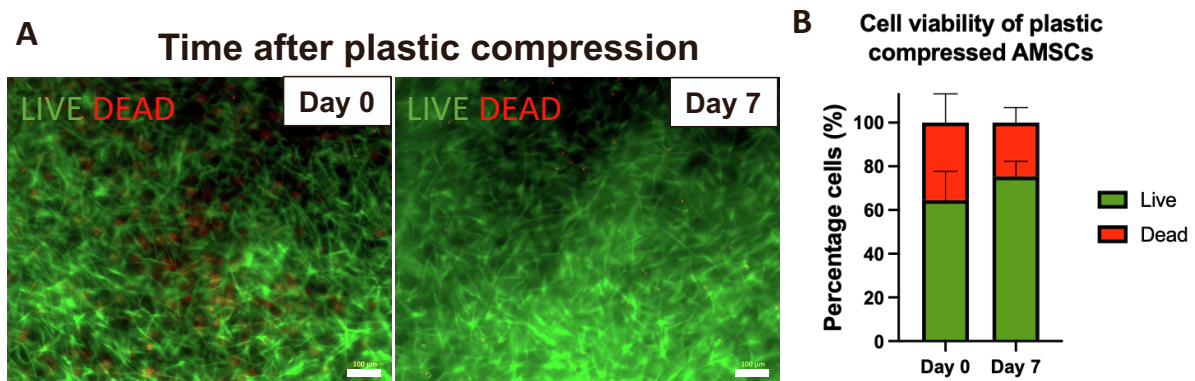

**Figure S2 Cell viability of plastic compressed AMSCs, related to Figure 1.** AMSCs were seeded in 0.2% collagen type I gels and subjected to plastic compression using RAFT™ absorbers to form a 10% collagen type I gel. A LIVE/DEAD assay was performed to assess cell viability. **A)** Representative images of cells stained with a LIVE/DEAD dye at day 0 and day 7 (Scale bar- 100  $\mu$ m). **B)** Quantification of percent live and dead cells at day 0 and day 7. An increase in cell viability was observed 7 days after plastic compression.

**Table S1** Primer sequences used to conduct gene expression analysis using qPCR, related to STAR Methods.

| <b>Gene Name</b> | <b>Forward (5'-3')</b> | <b>Reverse (3'-5')</b> |
|------------------|------------------------|------------------------|
| <i>CD146</i>     | GGAAGGTGTGGGTGAAAGAG   | GGACATTCAGGGTGCTCAG    |
| <i>CD164</i>     | CCTTAGCTTTCTCCCGAACG   | TGCTGGGTCGTGTTCTTG     |
| <i>CD73</i>      | ACTGGGACATTCGGGTTTTG   | CTCTTTGGAAGGTGGATTGC   |
| <i>FABP4</i>     | CATACTGGGCCAGGAATTTG   | GGACACCCCTCTAAGGTT     |
| <i>GAPDH</i>     | GCTCTCTGCTCCTCCTGTTC   | CGACCAAATCCGTTGACTCC   |
| <i>NES</i>       | GGCCACGTACAGGACCCTC    | CCTCTGGGGTCCTAGGGAAT   |
| <i>PDPN</i>      | CTCTGCTCTTCGTTTTGGGA   | GAGTCACCACATCATCTTCGG  |
| <i>PRX1</i>      | CGAGAGTGCAGGTGTGGTTT   | GAGCAGGACGAGGTACGAT    |
| <i>RUNX2</i>     | CGCATTCCATCCAGTAT      | GCCTGGGGTCTGTAATCTGA   |
| <i>SOX9</i>      | TGGAGACTTCTGAACGAGAGC  | CGTTCTTCACCGACTTCCTC   |
| <i>TAZ</i>       | GCTACACTCCCACTTCTTCAG  | CGCCATCTCCTTTCTCTCTC   |
| <i>YAP</i>       | CCCTCGTTTTGCCATGAACC   | TGTTGCTGCTGGTTGGAGTT   |
